# Supplementary material for: MedFusionGAN: multimodal medical image fusion using an unsupervised deep generative adversarial network
Source: Springer Nature journal article supplement (doi:10.1186/s12880-023-01160-w), 2023-12-07
Supplement: MOESM1 [file 26503898]

# Supplementary File for: MedFusionGAN: Multimodal Medical Image Fusion Using an Unsupervised Deep Generative Adversarial Network

Mojtaba Safari<sup>1,2,‡</sup>, Ali Fatemi, PhD<sup>3,4</sup>, Louis Archambault, PhD<sup>1,2</sup>

<sup>1</sup>Département de physique, de génie physique et d'optique, et Centre de recherche sur le cancer, Université Laval, Québec, Québec, Canada, <sup>2</sup>Service de physique médicale et radioprotection, Centre Intégré de Cancérologie, CHU de Québec – Université Laval et Centre de recherche du CHU de Québec, Québec, Québec, Canada, <sup>3</sup>Department of Physics, Jackson State University, Mississippi, USA <sup>4</sup>Merit Health Central, Department of Radiation Oncology, Gamma Knife Center, Mississippi, USA, <sup>‡</sup>Corresponding Author

Author to whom correspondence should be addressed. email: [mojtaba.safari.1@ulaval.ca](mailto:mojtaba.safari.1@ulaval.ca)

## I. Quantitative metrics

The brief definition of the metrics are as follows:

1. **Entropy (H):** This metric measured in bits provides the amount of information required to code a given image. The higher the image entropy is, the better the image fusion result is. It is defined as follows:

$$H(X) = - \sum_x p(x) \log_2(x) \quad (1)$$

where  $p(x)$  is probability image intensity  $x$  for a give image  $X$ .

2. **Standard deviation (SD):** SD given in Equation 2 is a statistical measure that provides information about image contrast. For a noiseless image, an higher SD means a better image contrast.

$$SD = \sqrt{\mathbb{E}\{(X - \mathbb{E}\{X\})^2\}} \quad (2)$$

3. **Mean gradient (MG):** MG quantifies an image's gradient information, and higher MG means more edge information. MG is mathematically defined as follows:

$$SD = \frac{1}{\Omega} \sum_{x \in X} \sqrt{0.5 \times ((\mathbf{D}_1 x)^2 + (\mathbf{D}_2 x)^2)} \quad (3)$$

Where  $\mathbf{D}_i$  is a differentiation along a given dimension  $i$ , and  $\Omega$  is the image size.

4. **spatial frequency (SF)**: SF measures an image gradient (image edge) and texture. It is calculated using row frequency (RF) and column frequency (CF) as follows:

$$SD = \sqrt{RF^2 + CF^2} \quad (4)$$

where  $RF = \sqrt{\frac{1}{\Omega} \sum_{x \in X} (\mathbf{D}_1 x)^2}$  and  $CF = \sqrt{\frac{1}{\Omega} \sum_{x \in X} (\mathbf{D}_2 x)^2}$ . An image with a higher SF provides more image edge information, and human eyes are more sensitive to images with higher SF.

5. **Mutual information (MI)**: For a given two images  $X$  and  $F$  with marginal probability distributions  $p_X(x)$  and  $p_F(f)$  and joint probability  $p_{X,F}(x, f)$ .  $X$  and  $F$  are statistically independent if  $p_{X,F}(x, f) = p_X(x) \cdot p_F(f)$ . The mutual information  $I(X, F)$  of  $X$  and  $F$  quantify the distance between the joint distribution  $p_{X,F}(x, f)$  and the distribution when two distributions are statistically independent  $p_X(x) \cdot p_F(f)$  using the Kullback-Leibler measure, i.e.,

$$I(X, F) = \sum_{x,f} p_{X,F}(x, f) \log \frac{p_{X,F}(x, f)}{p_X(x) \cdot p_F(f)} \quad (5)$$

It is related to the entropy of the images as follows:

$$\begin{aligned} I(X, F) &= H(X) + H(F) - H(X, F) \\ &= H(X) - H(X|F) \\ &= H(F) - H(F|X) \end{aligned} \quad (6)$$

where  $H(\bullet)$ ,  $H(\bullet, \bullet)$ , and  $H(\bullet|\bullet)$  are the entropy (given in Equation 1), joint entropy ( $= -\sum_{x,f} p_{X,F}(x, f) \log p_{X,F}(x, f)$ ), and conditional entropy ( $= -\sum_{x,f} p_{X,F}(x, f) \log p_{X|F=f}(x)$ ), respectively.

6. **Normalized cross correlation (NCC)**: NCC measures linear similarity between two images using the direct use of image signal intensities. It is calculated as follows:

$$NCC = \lambda_x \cdot r_{X,F} + \lambda_y \cdot r_{Y,F} \quad (7)$$

$r_{Z,f} = \frac{\mathbb{E}\{(Z - \mathbb{E}\{Z\}) \cdot (F - \mathbb{E}\{F\})\}}{\sqrt{\mathbb{E}\{(Z - \mathbb{E}\{Z\})^2\}} \cdot \sqrt{\mathbb{E}\{(F - \mathbb{E}\{F\})^2\}}}$  where  $Z \in \{X, Y\}$ . It ranges from 0 to 1 and greater value means a higher similarity between source images and fused image.

7. **Peak signal-to-noise ratio (PSNR)**: PSNR calculated in decibel measure image representation fidelity. It is a ratio between maximum signal intensity power and the noise distortion power, i.e.,

$$PSNR = 10 \log_{10} \frac{s^2}{MSE} \quad (8)$$

where  $s$  is the maximum signal intensity.  $MSE$  given in Equation 9 is the mean squared error that measure the image similarity.

$$MSE = \sum_{z \in \{X, Y\}} \lambda_z \cdot \frac{1}{M \cdot N} \sum_i^M \sum_j^N (z_{i,j} - F_{i,j})^2 \quad (9)$$

8.  $\mathbf{Q}^{XY/F}$  :  $Q^{XY/F}$  quantifies the amount of the edge information of the fused image. Considering the fusing source images X and Y and fused image F, edge ( $g(i, j)$ ) and orientation ( $\alpha(i, j)$ ) for each pixel is calculated as follows:

$$\begin{aligned} g_Z &= \sqrt{(\mathbf{D}_1 Z)^2 + (\mathbf{D}_2 Z)^2} \\ \alpha_Z &= \tan^{-1} \left( \frac{(\mathbf{D}_2 Z)^2}{(\mathbf{D}_1 Z)^2} \right) \end{aligned} \quad (10)$$

where  $Z \in X, Y$  and  $\mathbf{D}_i Z$  is the differential of  $Z$  along dimension  $i$ .

The relative edge strength ( $G^{ZF}$ ) and orientation ( $A^{ZF}$ ) of an input image  $Z$  ( $\in \{X, Y\}$ ) with respect to  $F$  are as follows:

$$\begin{aligned} G^{ZF}(i, j) &= \begin{cases} \frac{g_Z}{g_F} & \text{if } g_Z > g_F \\ \frac{g_Z}{g_F} & \text{otherwise} \end{cases}, \text{ where } Z \in \{X, Y\} \\ A^{ZF}(i, j) &= \frac{|\alpha_Z(i, j) - \alpha_F(i, j)| - \pi/2}{\pi/2}, \text{ where } Z \in \{X, Y\} \end{aligned} \quad (11)$$

Then, we can estimate the perceptual information loss in fused image for an input image  $Z$  ( $\in \{X, Y\}$ ) as follows:

$$\begin{aligned} Q_g^{ZF} &= \frac{\Gamma_g}{1 + e^{k_g(G^{ZF} - \sigma_g)}} \\ Q_\alpha^{ZF} &= \frac{\Gamma_\alpha}{1 + e^{k_\alpha(A^{ZF} - \sigma_\alpha)}} \end{aligned} \quad (12)$$

where constants  $\Gamma_g$ ,  $k_g$ ,  $\sigma_g$ ,  $\Gamma_\alpha$ ,  $k_\alpha$ , and  $\sigma_\alpha$  determine the exact shape of the sigmoid functions that form the edge strength and orientation values. Equation 13 calculates the edge information preservation.

$$Q^{ZF} = Q_g^{ZF} \cdot Q_\alpha^{ZF} \quad (13)$$

where  $Q^{ZF} = 1$  means lossless image fusion.

Finally, we obtain the fusion edge preservation from the weighted sum of the edge information, i.e.,

$$Q^{XY/F} = \frac{\lambda_X Q^{XF} + \lambda_Y Q^{YF}}{\lambda_X + \lambda_Y} \quad (14)$$

$Q^{XY/F} \in [0, 1]$  where the higher value means a better image fusion with lower information loss.

9. **Structural similarity index (SSIM):** SSIM assess the structural similarity of two images. It consists of three pixelwise comparisons including luminance, contrast, and structure. SSIM for two images  $Z$  and  $F$  is defined as follows:

$$SSIM(Z, F) = \frac{(2\mu_Z\mu_F + C_1)(2\sigma_{ZF} + C_2)}{(\mu_Z^2 + \mu_F^2 + C_1)(\sigma_Z^2 + \sigma_F^2 + C_2)} \quad (15)$$

where  $\mu_z$ ,  $\sigma_F$ , and  $\sigma_{ZF}$  are the local mean, local standard deviations, and local covariance between images  $Z$  and  $F$ , respectively.  $C_1$  and  $C_2$  are the constant parameters to stable the SSIM. The SSIM between source images and fused image is a weighted sum of the Equation 15 and is defined as:

$$SSIM = \lambda_X^{SSIM}.SSIM(X, F) + \lambda_Y^{SSIM}.SSIM(Y, F) \quad (16)$$
